# Supplementary material for: Nitrogen deficiency results in changes to cell wall composition of sorghum seedlings
Source: PubMed Central journal article supplement (PMC8640004; doi:10.1038/s41598-021-02570-y), 2021-12-02
Supplement: 41598_2021_2570_MOESM1_ESM.pdf [file 41598_2021_2570_MOESM1_ESM.pdf]

## Nitrogen deficiency results in changes to cell wall composition of sorghum seedlings

Reza Ramdan Rivai, Takuji Miyamoto, Tatsuya Awano, Rie Takada, Yuki Tobimatsu,  
Toshiaki Umezawa, Masaru Kobayashi

| Gene name                       | Gene ID      | Forward primer (5'→3') | Reverse primer (5'→3') |
|---------------------------------|--------------|------------------------|------------------------|
| <i>CESA</i>                     | Sb02g010110  | TAATGTTGCCAGCCTGTGGT   | GAACACAGCAAAGAGGTGCG   |
| <i>CSL</i>                      | Sb07g004110  | CTCTCCTACAACCTGGCCGTG  | GCCGCCTCACCATATCATCA   |
| <i>Endo-1,4-β glucanase</i>     | Sb01g008860  | CAAGTTTGCCAGGTCACAGC   | GCGCTTCGGGTACTTGTTC    |
| <i>Pectate lyase</i>            | Sb08g004905  | CCACCATGGCCAGAGGTATG   | CTCAGGAGCTTGGATAGCGG   |
| <i>Glucan-1,3-β-glucosidase</i> | Sb03g045460  | GGCTCACCTACACCAACCTG   | GCCCCTGGTTGTACTTCCTC   |
| <i>GAUT</i>                     | Sb01g012060  | GCCGAGAGAGAAAAGCCGAG   | TCAGGCGAGGTAATGGTGG    |
| <i>EXP</i>                      | Sb03g038290  | CAGTTCTAGCACGCCCTC     | AGGAAATGCCTAAGCGGGTG   |
| <i>XTH</i>                      | Sb10g028570  | GATAAGTACCGCTTCCCGCA   | CAAGTCATCATGCACACGGC   |
| <i>GSL</i>                      | Sb04g038510  | CTTATCAAACCTGCCGCCGTG  | TGCGTCTCGAGAATCGACTG   |
| <i>LAC</i>                      | Sb03g039970  | CCTTCCTCAGCACAAGGAGC   | CGAGGTTCCCGGTTGATCTC   |
| <i>RG-I lyase</i>               | Sb07g024560  | AGGGAGAACGCGATAGCAAG   | CAATCCCTGAAACGGGCTCT   |
| <i>PAL</i>                      | Sb04g026520  | CCAAAGTACAGCGGCTCAAG   | CAAGAACATGCGCATTGCAG   |
| <i>4CL/ Bmr2</i>                | Sb04g005210  | CATCTCCAAGCAGGTGGTGT   | ATTGCACGTAACAAGGCACG   |
| <i>CAD/ Bmr6</i>                | Sb04g005950  | TACCCTATGGTCCCTGGGC    | GCCGTCAGTGTAGACATCGT   |
| <i>C3'H</i>                     | Sb09g024210  | ACCTTCTGCACCACTTCGAG   | AGGCACCTCACATCTCAACG   |
| <i>F5H/ CAld5H</i>              | Sb01g017270  | ATGGCGGAGATGATGCACAG   | CGTCTCCTTGATGACGCACT   |
| <i>COMT/ CAldOMT/ Bmr12</i>     | Sb07g003860  | TTAATGGCCTAGCCTGCCTC   | CGCAGAGACAATTTCGACAGC  |
| <i>PP2A</i>                     | XM_002453490 | AACCCGCAAAACCCCAGACTA  | TACAGGTCGGGCTCATGGAAC  |

**Supplemental Table S1.** List of primers used for reverse transcription-quantitative PCR analysis
